# Supplementary material for: Transcriptional Landscape of Human Tissue Lymphocytes Unveils Uniqueness of Tumor-Infiltrating T Regulatory Cells
Source: PubMed Central journal article supplement — Immunity. 2016 Nov 15;45(5):1135–47. doi: 10.1016/j.immuni.2016.10.021 (PMC5119953; doi:10.1016/j.immuni.2016.10.021), 2016-11-15
Supplement: mmc1.pdf [file mmc1.pdf]

**Immunity, Volume 45**

## **Supplemental Information**

### **Transcriptional Landscape of Human Tissue**

#### **Lymphocytes Unveils Uniqueness**

#### **of Tumor-Infiltrating T Regulatory Cells**

**Marco De Simone, Alberto Arrighi, Grazisa Rossetti, Paola Gruarin, Valeria Ranzani, Claudia Politano, Raoul J.P. Bonnal, Elena Provasi, Maria Lucia Sarnicola, Ilaria Panzeri, Monica Moro, Mariacristina Crosti, Saveria Mazzara, Valentina Vaira, Silvano Bosari, Alessandro Palleschi, Luigi Santambrogio, Giorgio Bovo, Nicola Zucchini, Mauro Totis, Luca Gianotti, Giancarlo Cesana, Roberto A. Perego, Nirvana Maroni, Andrea Pisani Ceretti, Enrico Opocher, Raffaele De Francesco, Jens Geginat, Hendrik G. Stunnenberg, Sergio Abrignani, and Massimiliano Pagani**

Figure S1

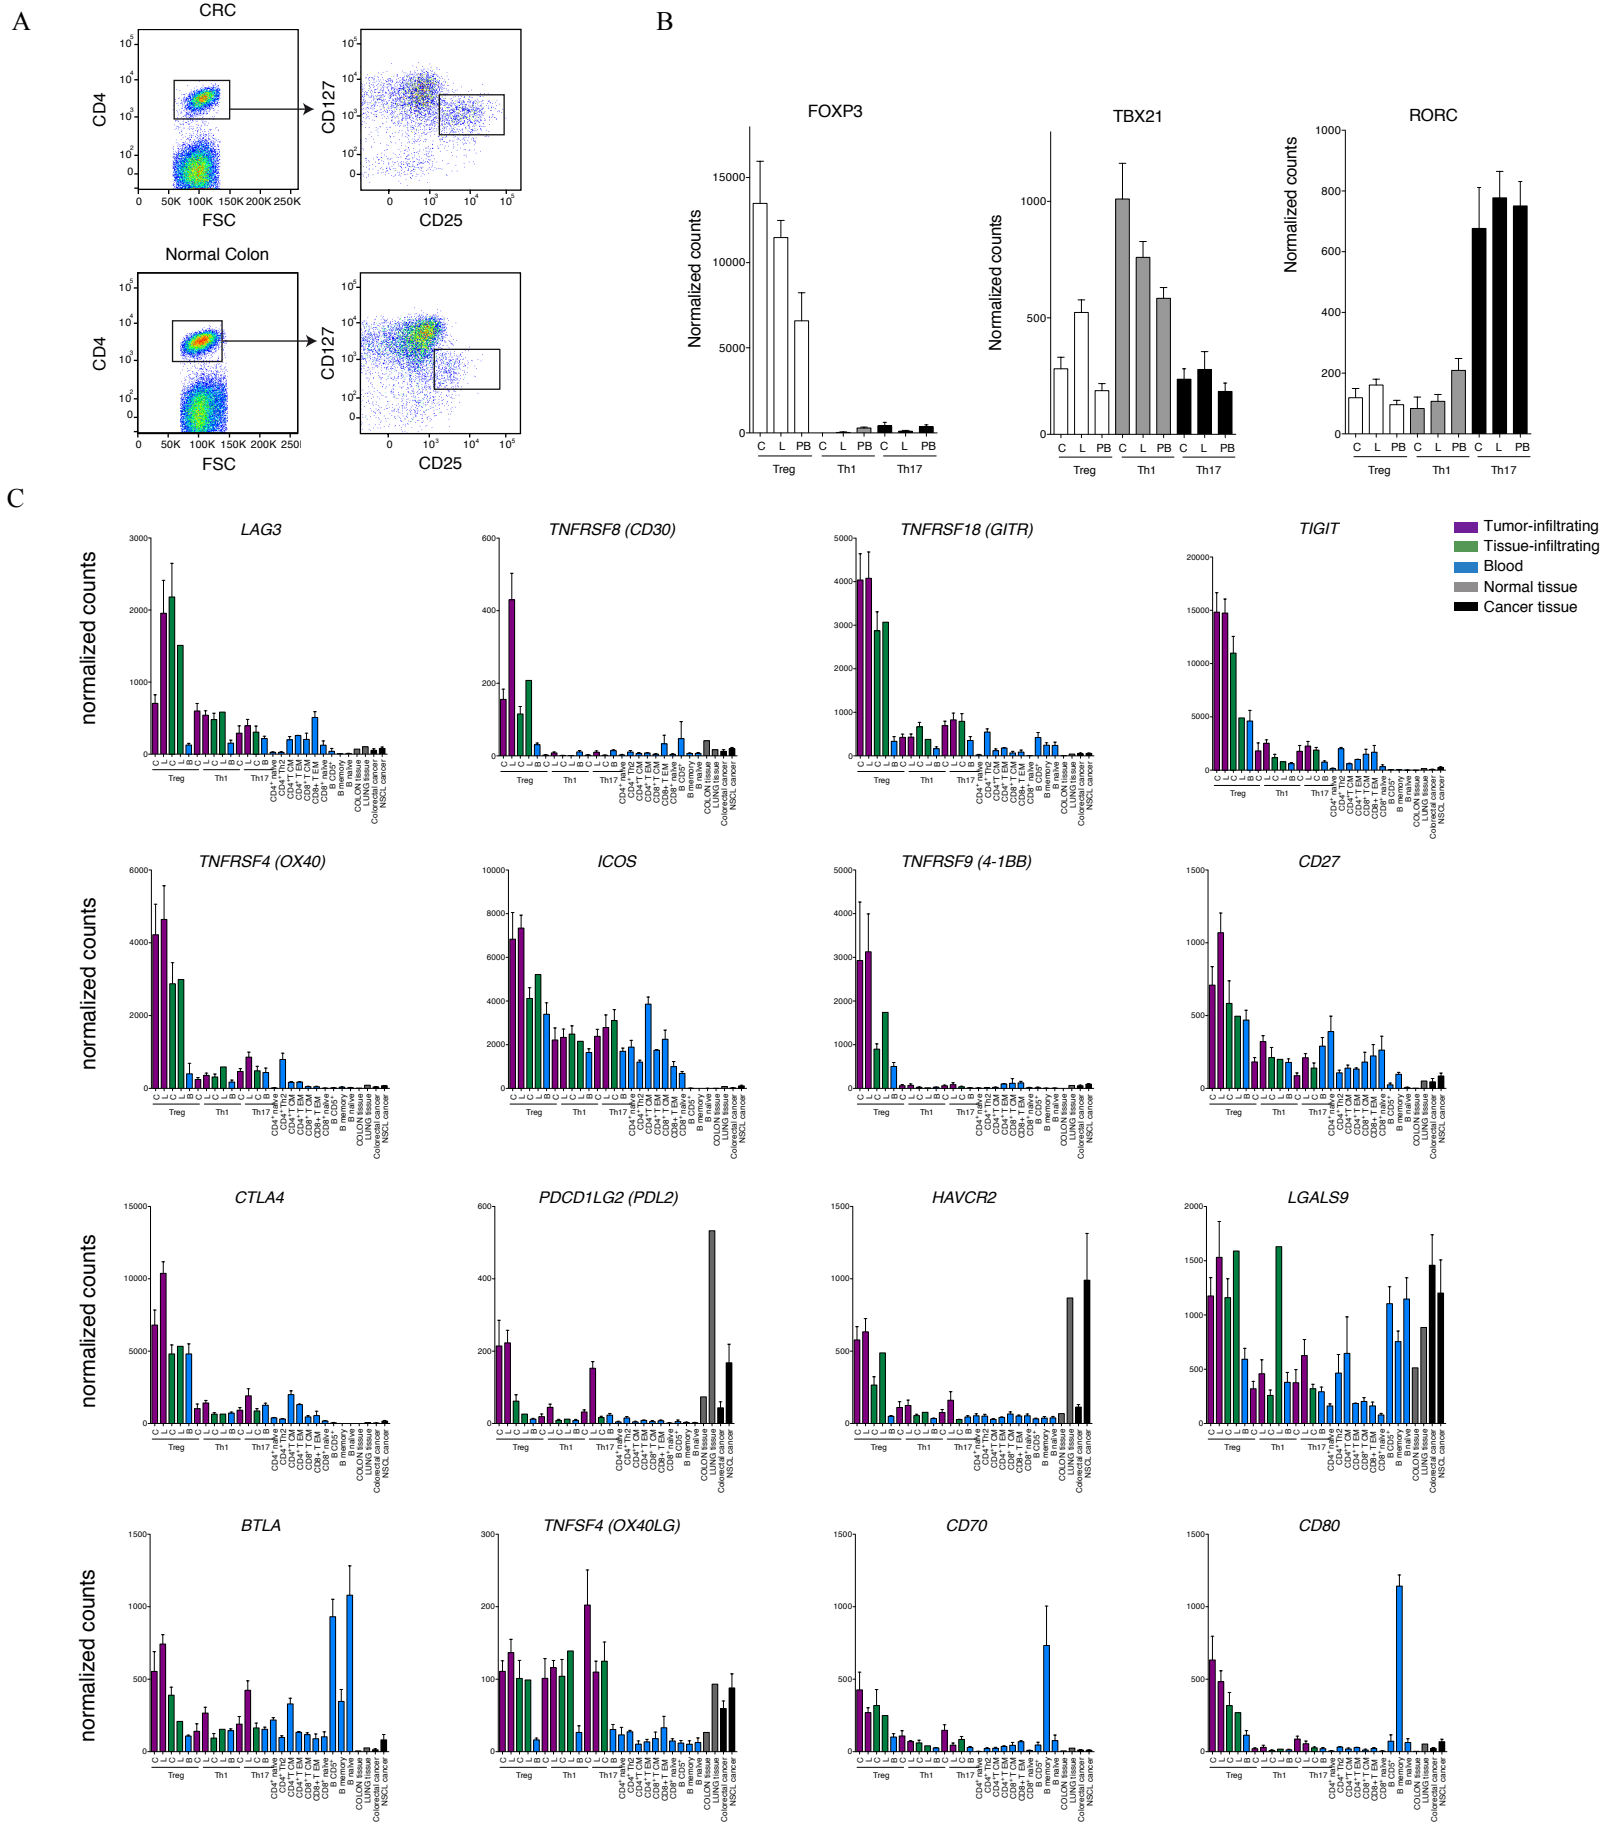

**Figure S1 related to Figure 1. Transcriptome analysis of tumor infiltrating lymphocytes**

(A) Representation of the sorting strategy of Treg cells infiltrating colorectal tumor or normal tissue.

(B) RNA-seq expression values (normalized counts) of FOXP3, TBX21 and RORC in CD4+ Th1, Th17 and Treg cells from CRC (C), NSCLC (L) or peripheral blood (PB) of healthy donors.

(C) RNA-seq normalized counts data for selected immune checkpoints and their ligands are shown as histogram plot. Cell population names are reported in the lower part of each graph, while gene names are shown in the upper part. To distinguish the origin of the different populations a color code has been assigned (upper right part of the figure).

Figure S2

A

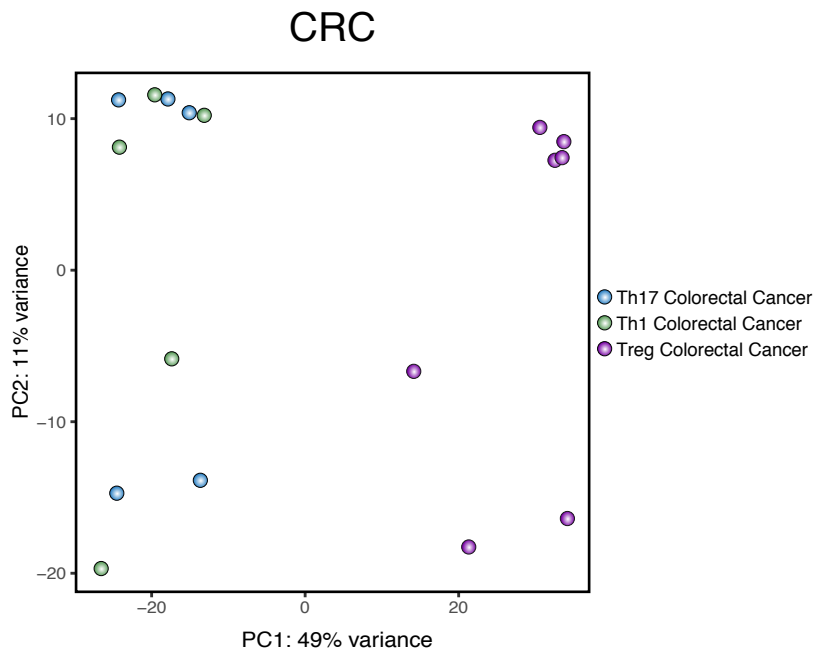

B

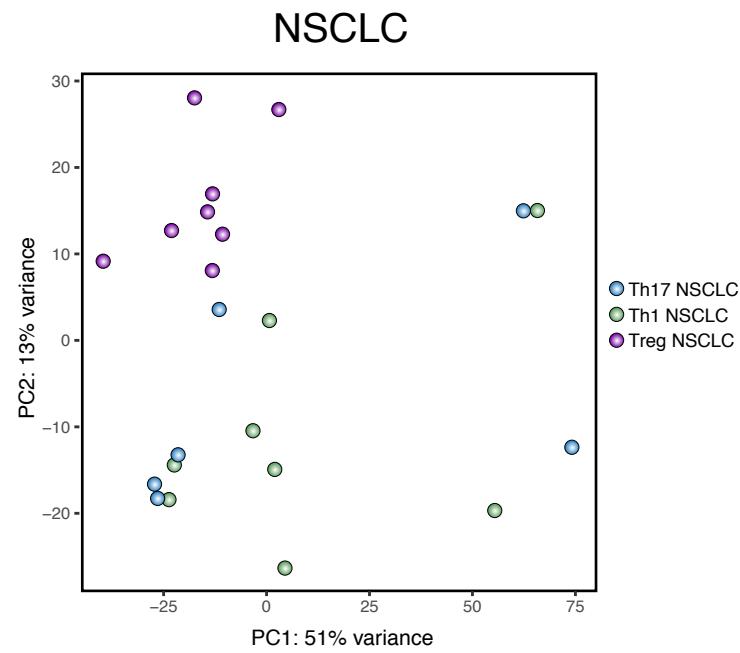

C

### CD4<sup>+</sup> Th1

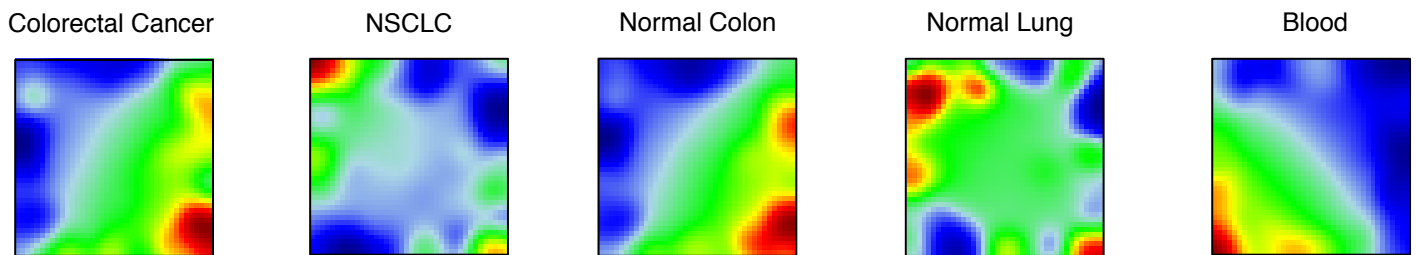

### CD4<sup>+</sup> Th17

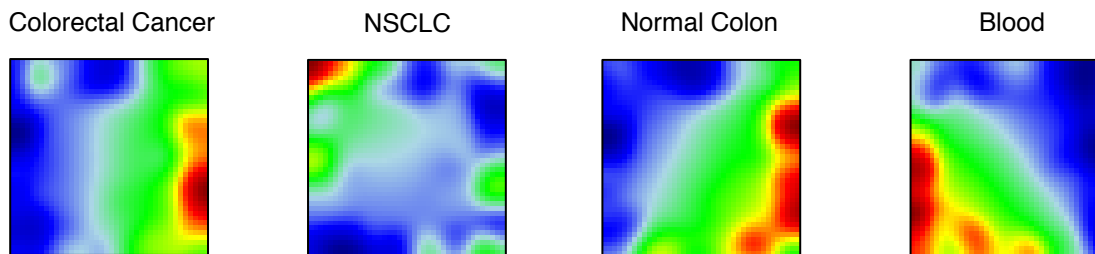

**Figure S2 related to Figure 2. SOM analysis identifies co-regulated genes in tumor infiltrating Treg cells.**

(A-B) Principal Component Analysis (PCA) has been performed on rlog-normalized (DESeq2) counts for tumor infiltrating CD4<sup>+</sup> Treg, Th1 and Th17 cells RNA-seq data in CRC (A) and NSCLC (B) samples.

(C) Self-Organizing Maps analysis has been performed on the RNA-seq dataset comprising Th1 and Th17 cell subsets. Bidimensional sample-level SOM profiles for different tissues are reported.

Figure S3

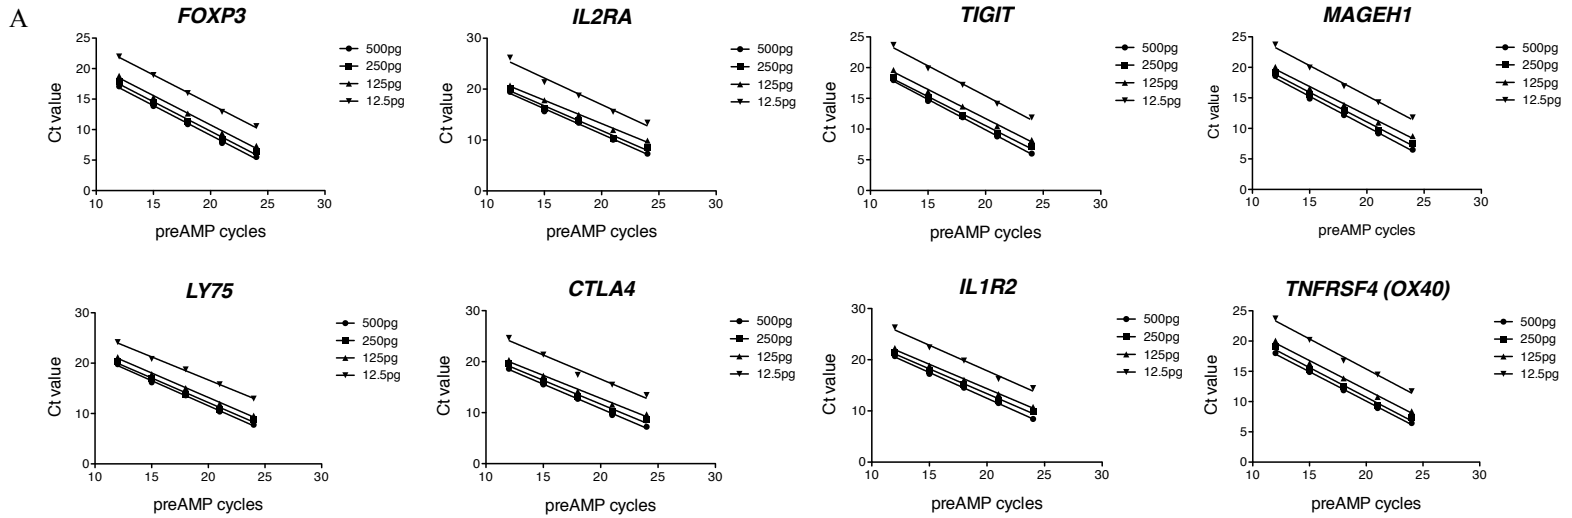

**B**

| $R^2$                 | 500pg  | 250pg  | 125pg  | 12.5pg |
|-----------------------|--------|--------|--------|--------|
| <b>FOXP3</b>          | 0.9967 | 0.9906 | 0.9933 | 0.9978 |
| <b>IL2RA</b>          | 0.9951 | 0.9879 | 0.9966 | 0.9792 |
| <b>TIGIT</b>          | 0.9987 | 0.9948 | 0.9949 | 0.992  |
| <b>MAGEH1</b>         | 0.9965 | 0.9946 | 0.9941 | 0.9922 |
| <b>LY75</b>           | 0.997  | 0.9917 | 0.997  | 0.9963 |
| <b>CTLA4</b>          | 0.9977 | 0.9852 | 0.9918 | 0.9775 |
| <b>IL1R2</b>          | 0.9987 | 0.993  | 0.9969 | 0.987  |
| <b>TNFRSF4 (OX40)</b> | 0.9982 | 0.9899 | 0.994  | 0.9925 |

**C**

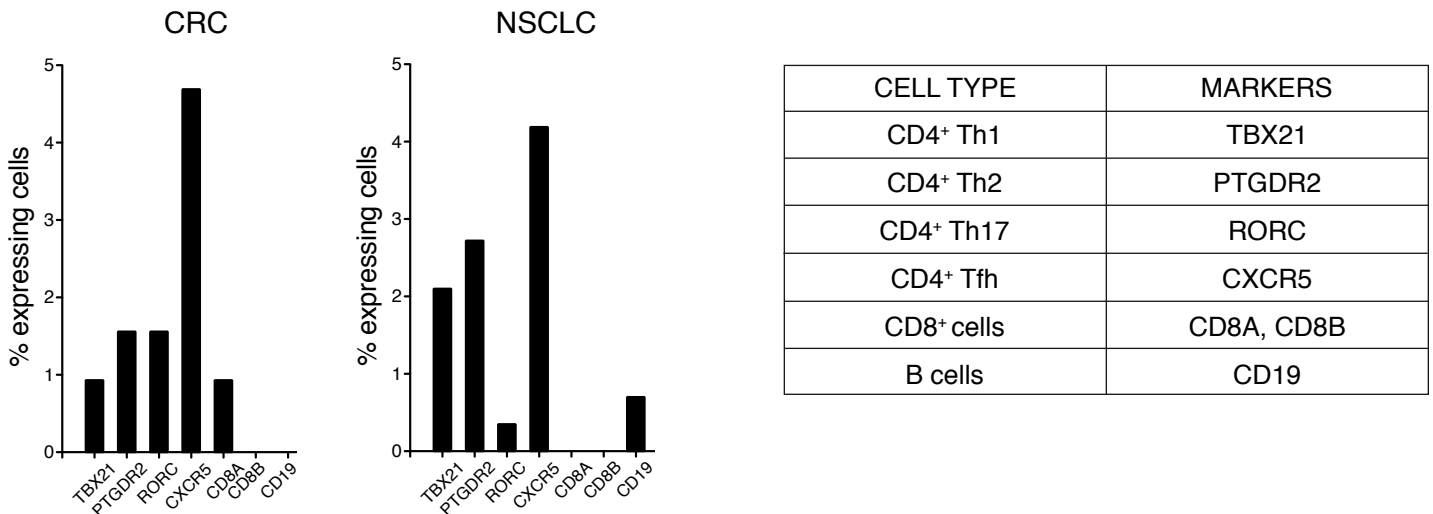

**Figure S3 related to Figure 3. Single-cell analysis of tumor infiltrating Treg cells.**

(A) Pre-amplification efficiency assessment. 500 pg, 250 pg, 125 pg or 12.5 pg of cDNA (total RNA equivalent), were pre-amplified for 12, 15, 18, 21 or 24 cycles and used as template in individual qPCRs for each gene. For each template condition Ct for each amount of pre-amplified cDNA (Y-axis) was plotted against the number of pre-amplification cycles performed (X-axis). A subset of 8 probes out of 79 is shown.

(B) Fitness of the linear correlation between amplification cycles and Ct values for each template condition was assessed and confirmed by  $R^2$ .

(C) Assessment of CD4<sup>+</sup> Treg, Th1, Th17, Th2, CD8<sup>+</sup> T cells and B cell markers expression (percentage of expressing cells) in single Treg cells purified from NSCLC and CRC

A

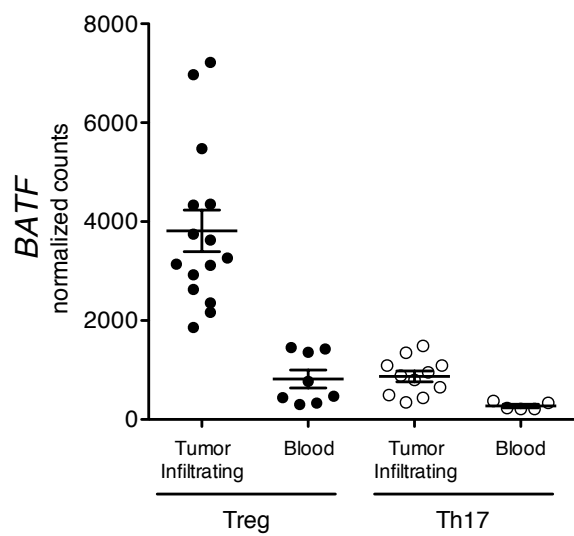

**Figure S4 related to Figure 4. Comparison of BATF expression in CD4+ Treg vs Th17 cells.**

BATF expression levels (RNA-seq normalized counts data) in CD4+ Treg and Th17 subsets isolated from tumor tissue or peripheral blood

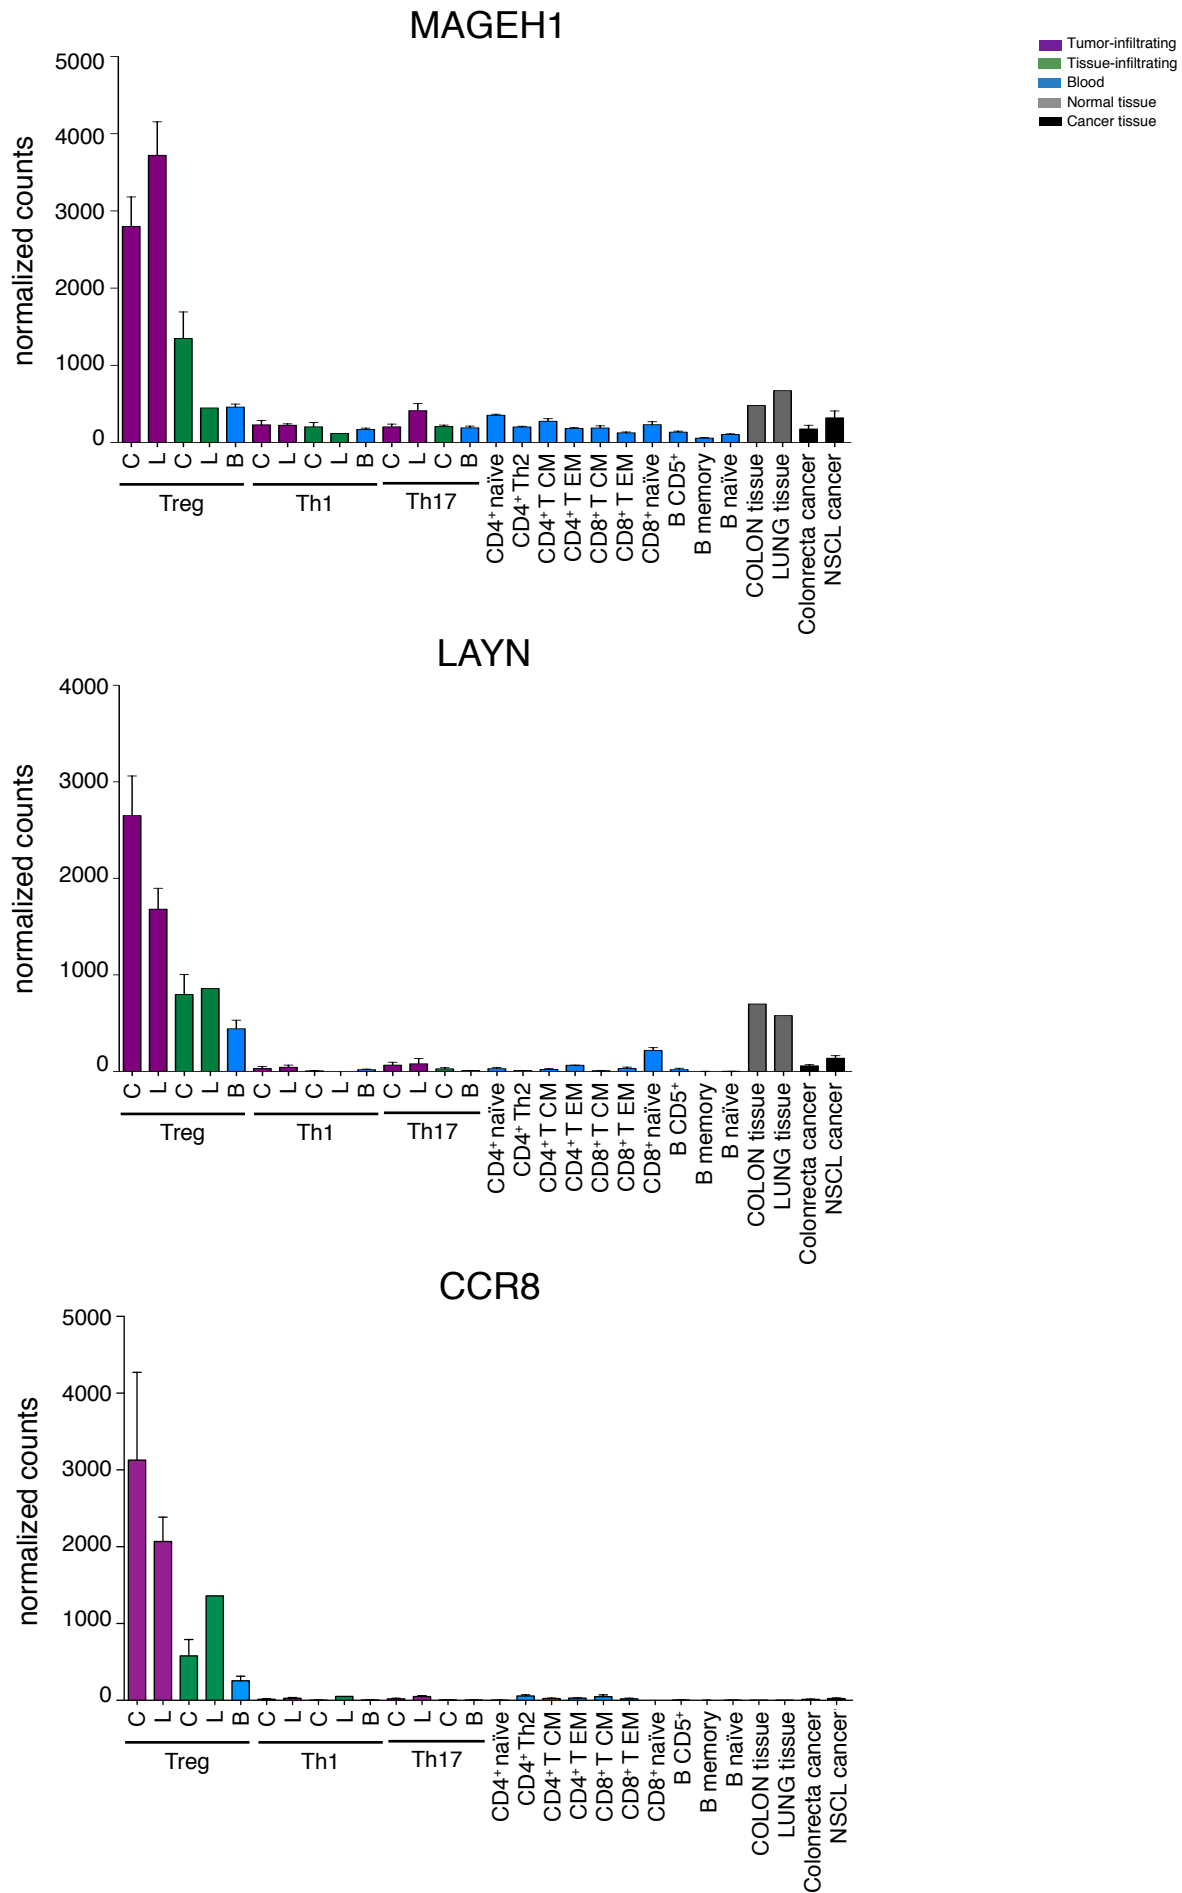

**Figure S5 related to Figure 5. Expression levels of tumour-infiltrating Treg signature genes.**

RNA-seq normalized counts data of three tumour-infiltrating Treg signature genes (MAGEH1, LAYN and CCR8) across listed cell populations. Cell populations are reported as a color code in the upper part of the figure.

## SUPPLEMENTAL TABLES

### **Table S1 related to Table 1. Patients' information and histological analysis**

For each cell subset profiled by RNA-sequencing, patient records are shown including: age at diagnosis, gender, smoking habit (for lung cancer patients), clinicopathological staging (TNM classification) tumor histotype and grade. For Treg cell isolated for qPCR experiment the same information are available, including also the number of live cells captured from each tumor and available for single-cell analysis. CRC: colorectal cancer; NSCLC: non-small cell lung cancer; (T): Tumor Sample; (H): Healthy Tissue; ADC: Adenocarcinoma; SCC: Squamous Cell Carcinoma; MUC ADC: Mucinous Adenocarcinoma.

### **Table S2 related to Figure 2. Co-regulated genes in tumor-infiltrating CD4+ Treg cells**

A list of the co-regulated genes in tumor-infiltrating CD4+ Treg cells is reported.

### **Table S3 related to Figure 2. Tumor-infiltrating Treg cell Signature: GO enrichment**

All the enriched GO terms (DAVID) for genes assigned to Treg cells regulated spots are reported with corresponding significance p-values.

### **Table S4 related to Figure 2. Expression levels of tumor-infiltrating Treg gene signatures in all the subsets analyzed**

Normalized expression values of tumor-infiltrating Treg signature genes across listed cell populations. Cell populations are reported as a color code in the lower part of the table.

### **Table S5 related to Figure 1. Expression levels of immune checkpoints genes in all the subsets analyzed.**

RNA-seq normalized counts data for selected immune checkpoints genes and their ligands in all the subsets analyzed. Color code for cell populations is reported in the lower part of the table.

**Supplemental Table S6 Related to Figure 3.**

List of TaqMan Probes and assay number used in RT-qPCR single-cell experiments

| Taqman Assays Numbers |               |           |               |
|-----------------------|---------------|-----------|---------------|
| Gene Name             | Assay Number  | Gene Name | Assay Number  |
| BCL2L1                | Hs00236329_m1 | ACP5      | Hs00356261_m1 |
| EOS                   | Hs00223842_m1 | BATF      | Hs00232390_m1 |
| AHCYL1                | Hs00198312_m1 | SLC35F2   | Hs00213850_m1 |
| NFE2L3                | Hs00852569_g1 | LAX1      | Hs00214948_m1 |
| IL12RB2               | Hs00155486_m1 | CCR8      | Hs00174764_m1 |
| CD177                 | Hs00360669_m1 | ADPRH     | Hs00153890_m1 |
| OX40                  | Hs00937194_g1 | IKZF2     | Hs00212361_m1 |
| METTL7A               | Hs00204042_m1 | CSF2RB    | Hs00166144_m1 |
| ENTPD1                | Hs00969559_m1 | NDFIP2    | Hs00324851_m1 |
| NFAT5                 | Hs00232437_m1 | CADM1     | Hs00942508_m1 |
| CTSC                  | Hs00175188_m1 | ICOS      | Hs00359999_m1 |
| SSH1                  | Hs00368014_m1 | COL9A2    | Hs00156712_m1 |
| TMEM184C              | Hs00217311_m1 | LTA       | Hs00236874_m1 |
| HTATIP2               | Hs01091727_m1 | MAGEH1    | Hs00371974_s1 |
| HSDL2                 | Hs00953689_m1 | IL21R     | Hs00222310_m1 |
| FOXP3                 | Hs01085834_m1 | SSTR3     | Hs01066399_m1 |
| IL2RA                 | Hs00907778_m1 | RNF145    | Hs01099642_m1 |
| LIMA1                 | Hs01035646_m1 | LAPTM4B   | Hs00363282_m1 |
| NAB1                  | Hs00428619_m1 | GRSF1     | Hs00909877_m1 |
| ACSL4                 | Hs00244871_m1 | ANKRD10   | Hs00214321_m1 |
| ERI1                  | Hs00405251_m1 | NPTN      | Hs01033353_m1 |
| FKBP1A                | Hs00356621_g1 | HS3ST3B1  | Hs00797512_s1 |
| LEPROT                | Hs00956627_s1 | TRAF3     | Hs00936781_m1 |
| NETO2                 | Hs00983152_m1 | RRAGB     | Hs01099767_m1 |
| VDR                   | Hs00172113_m1 | ZBTB38    | Hs00257315_s1 |
| CSF1                  | Hs00174164_m1 | TIGIT     | Hs00545087_m1 |
| GITR                  | Hs00188346_m1 | TFRC      | Hs00951083_m1 |
| IL1R2                 | Hs01030384_m1 | JAK1      | Hs01026983_m1 |
| IL1R1                 | Hs00991010_m1 | KSR1      | Hs00300134_m1 |
| LAYN                  | Hs00379511_m1 | ZNF282    | Hs00411965_m1 |
| THADA                 | Hs00736554_m1 | PTPRJ     | Hs01119326_m1 |
| CTLA4                 | Hs00175480_m1 | CHRNA6    | Hs02563509_s1 |
| CHST2                 | Hs01921028_s1 | IL2RB     | Hs01081697_m1 |
| CHST7                 | Hs00219871_m1 | TBX21     | Hs00203436_m1 |
| LRBA                  | Hs01032231_m1 | RORC      | Hs01076112_m1 |
| ETV7                  | Hs00903229_m1 | CXCR5     | Hs00540548_s1 |
| LY75                  | Hs00982383_m1 | CD8A      | Hs00233520_m1 |
| ADAT2                 | Hs00699339_m1 | CD8B      | Hs00174762_m1 |
| GCNT1                 | Hs00155243_m1 | PTGDR2    | Hs00173717_m1 |
| CASP1                 | Hs00354836_m1 | CD19      | Hs01047410_g1 |



## SUPPLEMENTAL EXPERIMENTAL PROCEDURES

### Human primary tissues

Primary human lung or colorectal tumors and non-neoplastic counterparts were obtained respectively from fifteen and fourteen patients who underwent surgery for therapeutic purposes at Fondazione IRCCS Ca' Granda, Policlinico or San Gerardo Hospitals (Italy). Records were available for all cases and included patients' age at diagnosis, gender, smoking habit (for lung cancer patients), clinicopathological staging (Sobin et al., 2009), tumor histotype and grade (Table S1). No patient received palliative surgery or neoadjuvant chemo- and/or radiotherapy. Informed consent was obtained from all patients, and the study was approved by the Institutional Review Board of the Fondazione IRCCS Ca' Granda (approval n. 30/2014).

Non-small-cell lung cancer (NSCLC) were cut into pieces and single-cell suspensions were prepared by using the Tumor Dissociation Kit, human and the gentleMACS™ Dissociator (Miltenyi Biotech cat. 130-095-929) according to the accompanying standard protocol. Cell suspensions were then isolated by ficoll-hypaque density-gradient centrifugation (Amersham Bioscience). Colorectal cancer (CRC) specimens were cut into pieces and incubated in DTT 0.1 mM (Sigma-Aldrich) for 10 min, then extensively washed in HBSS (Thermo Scientific) and incubated in 1 mM EDTA (Sigma-Aldrich) for 50 min at 37 °C in the presence of 5% CO<sub>2</sub>. They were then washed and incubated in type D collagenase solution 0.5 mg/mL (Roche Diagnostic) for 4 h at 37°C. Supernatants containing tumor infiltrating lymphocytes were filtered through 100 µm cell strainer, centrifuged and fractionated 1800X g for 30 min at 4°C on a four-step gradient consisting of 100%, 60%, and 40% and 30% Percoll solutions (Pharmacia). The T cell fraction was recovered from the inter- face between the 60% and 40% Percoll layers.

CD4 T cell subsets were purified by FACS sorting using the following fluorochrome conjugated antibodies: anti-CD4 APC/Cy7 (Biolegend clone OKT4), anti-CD27 Pacific Blue (Biolegend, clone M-T271), anti-IL7R PE (Miltenyi, clone MB15-18C9), anti-CD25 PE/Cy7 (eBioscience, clone BC96), anti-CXCR3 PE/Cy5 (BD, clone 1C6/CXCR3), anti-CCR6 APC (Biolegend, clone G034E3) and anti-CCR5 FITC (Biolegend, clone j418F1) using a FACS Aria II (BD).

### Flow cytometry

To validate surface marker expression cells were directly stained with the following fluorochrome-conjugated antibodies and analyzed by flow cytometry: anti-CD4 (Biolegend, clone OKT4); anti-PD-L2 (Biolegend, Clone CL24F.10C12); anti-CD127 (eBioscience, clone RDR5); anti-BATF (eBioscience, clone MBM7C7), anti-GITR (eBioscience, clone eBIOAIR), anti-CD25 (Miltenyi, clone 4E3) and anti 4-1BB (eBioscience clone 4B4) anti CCR8(Biolegend clone L263G8) anti CD30 (eBioscience, clone Ber-H2) anti PD-L1 (Biolegend clone 29E.2A3) anti TIGIT (eBioscience, clone MBSA43) anti IL1R2 (R and D clone 34141) IL21R (Biolegend clone 2G1-K12) anti OX40 (Biolegend clone Ber-ACT35). Intracellular staining was performed using eBioscience Foxp3 staining kit according to the manufacturer's protocol (eBioscience cat 00-5523-00). Briefly cells were harvested and fixed for 30 min in fixation/permeabilization buffer at 4 °C, and then stained with anti-FOXP3 antibody (eBioscience, clone 236A/E7) and anti-BATF (ebioscience clone MBM7C7) in permeabilisation buffer for 30 min at 4 °C. Cells were then washed two times, resuspended in FACS washing buffer and analyzed by flow cytometry.

### Suppression assay.

$4 \times 10^4$  carboxyfluorescein diacetate succinimidyl ester (CFSE)-labeled (1 µM) responders Naive<sup>+</sup> T cells from healthy donors were cocultured with different E/T ratio with unlabeled CD127<sup>-</sup>CD25<sup>low</sup>CD4<sup>+</sup> T cells sorted from TILs or PBMCs of patients with CRC or NSCLC, using FACS Aria II (BD Biosciences), in the presence of CD11c<sup>+</sup>CD1c<sup>+</sup>dendritic cells as antigen-presenting cells and 0.5 mg/ml anti-CD3 (OKT3) mAb. Proliferation of CFSE-labeled cells was assessed by flow cytometry after 96 hr culture.

Competition assays with blocking antibodies were performed following the same protocol starting from  $2 \times 10^5$  CFSE labeled CD4<sup>+</sup> naïve T cells from healthy donors cocultured at 1:32 Responders/Tumor Treg cell ratio. The following antibodies at a final concentration of 20µg/ml were used purified anti-human PDL-1 (biolegend clone 29E.2 A 3); purified anti-human PD-L2 (biolegend clone MIH18); anti-human Functional Grade (ebioscience clone MBSA43)

### RNA isolation and RNA sequencing

RNA from tumor-infiltrating lymphocytes was isolated using mirVana Isolation Kit. Residual contaminating genomic DNA was removed from the total RNA fraction using Turbo DNA-free (Thermo Fisher). The RNA yields were quantified using the QuantiFluor RNA System (Promega) and the RNA quality was assessed by the Agilent 2100 Bioanalyzer (Agilent). Libraries for Illumina sequencing were constructed from 50 ng of

total RNA with the Illumina TruSeq RNA Sample Preparation Kit v2 (Set A). The generated libraries were loaded on to the cBot (Illumina) for clustering on a HiSeq Flow Cell v3. The flow cell was then sequenced using a HiSeq 2500 in High Output mode (Illumina). A paired-end (2×125) run was performed.

### RNA-seq data analysis

Raw .fastq files were analyzed using FastQC v0.11.3, and adapter removal was performed using cutadapt 1.8. Cutadapt is run both for reverse and forward sequences with default parameters [--anywhere <adapter1> --anywhere <adapter2> --overlap 10 --times 2 --mask-adapter]. Adapter sequences used for libraries preparation are

Adapter1:

```
AGATCGGAAGAGCACACGTCTGAACTCCAGTCACNNNNNNATCTCGTATGCCGTCTTCTGCTTG
```

Adapter2:

```
AGATCGGAAGAGCGTCGTGTAGGGAAAGAGTGTAGATCTCGGTGGTCGCCGTATCATT
```

Trimming was performed on raw reads using Trimmomatic (Bolger et al., 2014): standard parameters for phred33 encoding were used: ILLUMINACLIP (LEADING:3 TRAILING:3 SLIDINGWINDOW:4:15), MINLEN parameter was set to 50.

**Mapping and quantification:** reads mapping to the reference genome (GRCh38) was performed on quality-checked and trimmed reads using STAR 2.4.1c: [STAR --genomeDir <index\_star> --runThreadN <cpu\_number> --readFilesIn <trimmed>\_R1.fastq.gz <trimmed>\_R2\_P.fastq.gz --readFilesCommand zcat]. The reference annotation is Ensembl v80. The overlap of reads with annotation features found in the reference .gtf was calculated using HT-seq v0.6.1. The output computed for each sample (raw read counts) was then used as input for DESeq2 analysis. Raw counts were normalized using DESeq2's function 'rlog', and normalized counts were used to perform and visualize Principal Component Analysis (PCA) results (using DESeq2's 'plotPCA' function).

**Differential expression analysis:** differential expression analyses of tumor-infiltrating CD4+ Treg/Th1/Th17 subsets vs. CD4+ Treg/Th1/Th17 from PBMC were performed using DESeq2. Upregulated/downregulated genes were selected for subsequent analyses if their expression values were found to exceed the threshold of 0.05 FDR (Benjamini-Hochberg correction).

**SOM (theory):** SOMs can be thought of as a spatially constrained form of k-means clustering (Ripley, 1996). In this analogy, every unit in the grid corresponds to a cluster to which a certain number of gene expression input vectors are mapped. For each vector during the training phase of the algorithm, the “winning unit” (the one most similar to the current training object) will be updated to become even more similar. A weighted average is used, where the weight of the new object is one of the training parameters of the SOM. The update is not restricted to the winning unit, but it is extended to the units in the immediate neighborhood, so that the structure itself of the map can fit the data. The size of the neighborhood progressively shrinks, so that eventually only the winning units are adapted. In the oposSOM package (Loffler-Wirth et al., 2015), a rectangular SOM topology with a Gaussian neighborhood function is used. Upon training completion, the distance of vectors describing groups of samples (e.g. tumor-infiltrating lymphocytes) is calculated (using the same metric that was used for training) and a map with color-coded distances that is specific for the considered condition is drawn. These expression portraits exhibit characteristic spatial color patterns and serves as fingerprint of the transcriptional activity.

**SOM analysis:** In order to translate RNA-seq expression data into metadata of reduced dimensions and identify genes that are preferentially expressed in tumor-infiltrating lymphocyte subsets, Self-Organizing Maps (SOMs) analysis was performed on our dataset. This method transformed the whole genome expression pattern of about 7,000 differentially expressed genes into a SOM coordinate system, which allowed for intuitive visualization of transcriptional activity of each sample in terms of mosaic portraits. SOM analysis combines strong clustering, dimensionality reduction, multidimensional scaling and visualization capabilities which have been shown to be advantageous compared to alternative methods such as clustering heatmaps and negative matrix factorization when applied to molecular high-throughput data (Wirth et al., 2012). SOM maps constitute fingerprints of the transcriptional activity of the respective cell population sample and allow for direct comparison of the expression of individual samples in a simple and intuitive way. The color gradient is instrumental to visualize over- or underexpression of the nodes for the particular sample compared with the mean expression level of each node in the pool of all samples

studied. Analyses were carried out using the R package oposSOM (Loffler-Wirth et al., 2015) using default parameters. Expression values of genes selected in the previous differential expression step were Z-score normalized and supplied in input to the automated pipeline for SOM training and analysis. Genes from up/downregulated spots in the bidimensional output space were selected according to FDR threshold ( $<0.1$ ) at group-level. Expression values of genes assigned to regulated spots extracted from the oposSOM output were then subject to correlation analysis using model vectors to further refine the results and genes having expression profiles with  $P\text{-val} < 0.05$  were discarded from further analysis and signature definition.

**Pearson correlation analyses:** correlation analyses were performed using Pearson correlation metric, and significance p-values were calculated using the *cor.test* function from the WGCNA R package.

**GO analysis:** a GO enrichment analysis was performed for biological process terms associated with genes assigned to up/downregulated spots in the SOM bidimensional space using DAVID (Huang da et al., 2009). Adjusted p-val has been used for terms ranking and selection ( $<0.05$ ).

### **Capturing of single cells, preparation of cDNA and single-cell PCR**

Treg cells from 5 CRC and 5 NSCLC specimens were isolated as previously described (See also Table S1). Single cells were captured on a microfluidic chip on the C1 System (Fluidigm) and whole-transcriptome amplified. cDNA was prepared on chip using the SMARTer Ultra Low RNA kit (Clontech). Cells were loaded onto the chip at a concentration of  $3\text{--}5 \times 10^5$  cells/ml, stained for viability (LIVE/DEAD cell viability assay; Thermo Fisher) and imaged by phase-contrast and fluorescence microscopy to assess the number and viability of cells per capture site. Only single, live cells were included in the analysis. For qPCR experiments, harvested cDNA was pre-amplified using a 0.2X pool of primers prepared from the same gene expression assays to be used for qPCR. Pre-amplification allows for multiplex sequence-specific amplification 78 targets. In detail, a 1.25  $\mu\text{l}$  aliquot of single cell cDNA was pre-amplified in a final volume of 5  $\mu\text{l}$  using 1  $\mu\text{l}$  of PreAmp Master Mix (Fluidigm) and 1.25  $\mu\text{l}$  pooled TaqMan assay mix (0.2x). cDNA went through amplification by denaturing at  $95^\circ\text{C}$  for 15 s, and annealing and amplification at  $60^\circ\text{C}$  for 4 min for 20 cycles. After cycling, pre-amplified cDNA was diluted 1:5 by adding 20  $\mu\text{l}$  TE Buffer to the final 5  $\mu\text{l}$  reaction volume for a total volume of 25  $\mu\text{l}$ .

Single-cell gene expression experiments were performed using the 96x96 quantitative PCR (qPCR) DynamicArray microfluidic chips (Fluidigm). A 2.25  $\mu\text{l}$  aliquot of amplified cDNA was mixed with 2.5  $\mu\text{l}$  of TaqMan Fast Advanced Master Mix (Thermo Fisher) and 0.25  $\mu\text{l}$  of Fluidigm's "sample loading agent," then inserted into one of the chip "sample" inlets. A 2.5  $\mu\text{l}$  aliquot of each 20X TaqMan assay was mixed with 2.5  $\mu\text{l}$  of Fluidigm's "assay loading agent" and individually inserted into one of the chip "assay" inlets. Samples and probes were loaded into 96 x96 chips using an IFC Controller HX (Fluidigm), then transferred to a BioMark real-time PCR reader (Fluidigm) following manufacturer's instructions. A list of the 78 TaqMan assays used in this study is provided below.

**Single-cell data analysis:** The Quality Threshold in the BioMark™ Analysis software is a qualitative tool designed to measure the "quality" of each amplification curve. Basically, each amplification curve is compared to an ideal exponential curve and as the quality score approaches 1 the closer it is to ideal. The further the curve is from ideal, its quality score approaches 0. The default cutoff of 0.65 is an arbitrary value set by Fluidigm. Any curve above 0.65 passes. Any curve below, fails. Baseline correction was set on Linear (Derivative)[default]. Ct Threshold Method was set on Auto (Detectors). This method independently calculates a threshold for each detector on a chip. For clustering and downstream analysis, raw Cts have been converted to Log2Exp by using a Limit of Detection (LOD) of 35, which corresponds to the last PCR cycle. Co-expression analysis has been performed by considering both CRC and NSCLC samples on those genes for which both FOXP3 and IL2RA were co-expressed at least to 2%. Gene's levels above the background were depicted as violin plots after log2 scale transformation by ggplot2 (v. 2.1.10). The violin color gradient is the percentage of cells that are expressing the gene of interest and the upper bound of the color scale is the maximum percentage of cells that express a gene of the whole geneset.

### **Procedure for the removal of transcripts whose expression values are affected by the 'dropout' effect.**

Single-cell qPCR data are inherently noisy, and due the limitations of current technologies the expression patterns of a certain number of genes may be affected by the 'dropout effect'. We performed a gene selection procedure in order to take into account this 'dropout' effect and discard those genes whose expression values cannot be reliably used in a binary comparison (tumor-peripheral vs blood). We fitted a number of parametric distributions to the ratios of detected genes on the total number of tumor cells (both NSCLC and CRC) and selected the reciprocal inverse Gaussian continuous random variable as best fit. We then calculated the median value of the fitted distribution and discarded those genes whose

detection ratio is less than this threshold value (at least 8.4% of detection). We reasoned that these genes are more likely to be affected by the 'dropout' effect. With this threshold we selected 45 genes for which a non-parametric T-test (Wilcoxon Mann Whitney test  $p < 0.05$ ) has been performed (by comparing tumor vs. peripheral blood samples)

### Meta analysis Kaplan-Meier and stage correlation

Statistical analysis was performed by using the R survival package (Therneau T. 2013). Survival times were calculated as the number of days from initial pathological diagnosis to death, or the number of days from initial pathological diagnosis to the last time the patient was reported to be alive. The Kaplan-Meier (KM) was used to compare the high and low expression levels of the tumor-Treg cell signature transcripts in either CRC (GSE17536) and NSCLC (GSE41271) patients. For both studies annotation was normalized to four tumor stages (1,2,3,4). For study GSE41271 five patients were excluded due to incomplete or inaccurate annotation (GSM1012883, GSM1012884, GSM1012885, GSM1013100, GSM1012888), retaining a total of two hundred and sixty three patients. Patients from both studies were labeled as 'High' 'Low' whether or not their relative expression values exceeded a decision boundary (mean of the samples). We define  $\check{x}_{ij}$  to denote the relative expression of the gene  $i$  for the  $n$  samples of the study normalized to the CD3 level:

$$\check{x}_{i,j} = \frac{x_{i,j}}{x_{CD3G,j}} ; \quad i = (CCR8, MAGEH1, LAYN) \quad j = 1, 2, \dots, n \text{ samples}$$

To classify a patient, a threshold on the  $\check{x}_{ij}$  is required and defined as

$$T_{(Upper, Lower)} = \text{median}(\check{x}_{i,j}) \pm \frac{\sigma(\check{x}_{i,j})}{10}$$

where  $T_{(Upper, Lower)}$  represent the upper and lower extreme of the decision boundary:

$$\left\{ \begin{array}{l} \check{x}_{i,j} > T_{Upper} \text{ High} \\ \check{x}_{i,j} < T_{Lower} \text{ Low} \\ T_{Upper} \leq \check{x}_{i,j} \leq T_{Lower} \text{ excluded} \end{array} \right.$$

We examined the prognostic significance of tumor Treg cells transcripts by using log-rank statistics; a p-value of less than 0.05 was considered statistically significant.

Since the log-rank test resulted in a p-value of less than 0.05, a post stage comparison by means of box plot representation was performed in order to evaluate the correlation degree between the expression level of the transcripts and tumor stages in the cohort of CRC patients. . The annotation was normalized to four tumor stages (1,2,3,4).

### SUPPLEMENTAL REFERENCES

- Bolger, A.M., Lohse, M., and Usadel, B. (2014). Trimmomatic: a flexible trimmer for Illumina sequence data. *Bioinformatics* 30, 2114-2120.
- Huang da, W., Sherman, B.T., and Lempicki, R.A. (2009). Systematic and integrative analysis of large gene lists using DAVID bioinformatics resources. *Nat Protoc* 4, 44-57.
- Loffler-Wirth, H., Kalcher, M., and Binder, H. (2015). oposSOM: R-package for high-dimensional portraying of genome-wide expression landscapes on bioconductor. *Bioinformatics* 31, 3225-3227.
- Ripley, B. D. (1996) *Pattern Recognition and Neural Networks*. Cambridge: Cambridge University Press. [i, 2, 8, 36, 42, 59, 69, 73, 79, 91, 92]
- Sobin, L.H., Gospodarowicz, M.K., Wittekind, C., International Union against Cancer., and ebrary Inc. (2009). *TNM classification of malignant tumours* (Chichester, West Sussex, UK ; Hoboken, NJ: Wiley-Blackwell.), pp. xx, 310 p.
- Therneau T. 2013. *A package for survival analysis in S*. R package version 2.37-4.
- Wirth, H., von Bergen, M., and Binder, H. (2012). Mining SOM expression portraits: feature selection and integrating concepts of molecular function. *BioData Min* 5, 18.
